# Supplementary material for: The Dirac cone in two-dimensional tetragonal silicon carbides: a ring coupling mechanism
Source: Royal Society of Chemistry journal article supplement (doi:10.1039/d1nr04586e), 2021-01-01
Supplement: d1nr04586e1.pdf [file d1nr04586e1.pdf]

**Supplemental Material for**  
**“The Dirac Cone in Two-Dimensional Tetragonal Silicon Carbide:**  
**Ring Coupling Mechanism”**

Weixiang Kong<sup>1</sup>, Xiaoliang Xiao<sup>1</sup>, Wangping Xu<sup>1</sup>, Rui Wang<sup>1</sup>, Li-Yong Gan<sup>1</sup>, Juan Wei<sup>1</sup>, Jing Fan<sup>2</sup>,

and Xiaozhi Wu<sup>1\*</sup>

<sup>1</sup>Department of Physics, Chongqing University, Chongqing 401331, China.

<sup>2</sup>Center for Computational Science and Engineering,

Southern University of Science and Technology, Shenzhen 518055, China

|                     | a (Å)              | b (Å)              | c (Å) | $\theta$ (°)     | Bond length (Å)    |              |       | $E_c$ (eV)         |
|---------------------|--------------------|--------------------|-------|------------------|--------------------|--------------|-------|--------------------|
|                     |                    |                    |       |                  | C-C                | Si-Si        | C-Si  |                    |
| graphene            | 2.468              | 2.468              | PL    | 120              | 1.425              |              |       | 9.141              |
|                     | 2.461 <sup>a</sup> | 2.461 <sup>a</sup> | PL    | 120 <sup>a</sup> | 1.421 <sup>a</sup> |              |       | 9.259 <sup>a</sup> |
| T graphene (planar) | 3.447              | 3.447              | PL    | 90               | $b_1$ :1.374       | $b_2$ :1.466 |       | 8.626              |
|                     | 3.41 <sup>b</sup>  | 3.41 <sup>b</sup>  | PL    | 90 <sup>b</sup>  |                    |              |       |                    |
| silicene            | 3.867              | 3.867              | 0.453 | 120              | 2.278              |              |       | 4.698              |
|                     | 3.865 <sup>a</sup> | 3.865 <sup>a</sup> |       | 120 <sup>a</sup> | 2.276 <sup>a</sup> |              |       | 4.784 <sup>a</sup> |
| h-SiC               | 3.097              | 3.097              | PL    | 120              | 1.787              |              |       | 6.941              |
|                     | 3.084 <sup>a</sup> | 3.084 <sup>a</sup> | PL    | 120 <sup>a</sup> | 1.780 <sup>a</sup> |              |       | 7.076 <sup>a</sup> |
| T1 SiC              | 6.094              | 6.094              | PL    | 90               | $b_1$ :1.813       | $b_2$ :1.747 |       | 6.676              |
| T2 SiC              | 6.246              | 6.246              | PL    | 90               | 1.465              | 2.264        | 1.781 | 6.378              |
| T3 SiC              | 4.032              | 4.758              | 0.536 | 90               | 1.374              | 2.292        | 1.854 | 6.459              |

a Reference 1.

b Reference 2.

Table.S1 The lattice information and cohesive energy( $E_c$ ) of T-SiC are calculated. In order to evaluate the structural characteristics and stability of T-SiC, the corresponding parameters of graphene, T graphene, silicene, and h-SiC are calculated, and the corresponding values in the literature are also given. It can be seen that the two are quite consistent.

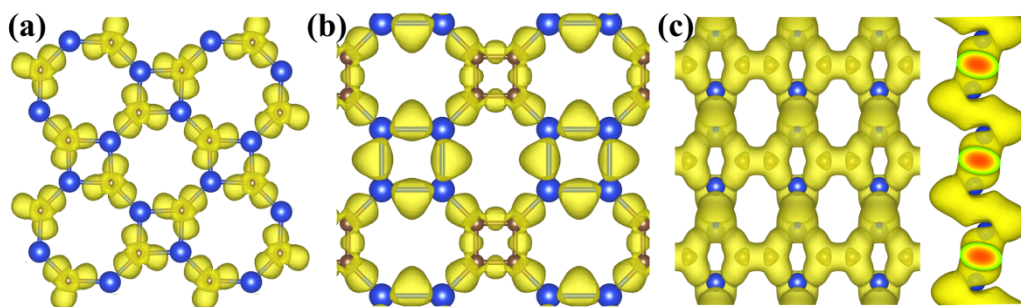

Fig.S1 Electron localization function(ELF) of (a)T<sub>1</sub>-SiC (b)T<sub>2</sub>-SiC and (c)T<sub>3</sub>-SiC.

| Charge distribution (Bader analysis) |       |        |           |           |
|--------------------------------------|-------|--------|-----------|-----------|
|                                      | h-SiC | T1-SiC | T2-SiC    | T3-SiC    |
| C                                    | 6.51  | 6.48   | 4.62-5.03 | 5.23-5.47 |
| Si                                   | 1.49  | 1.51   | 3.03-3.31 | 2.62-2.68 |

Table.S2 The number of electrons around an atom calculated using Bader charge analysis.

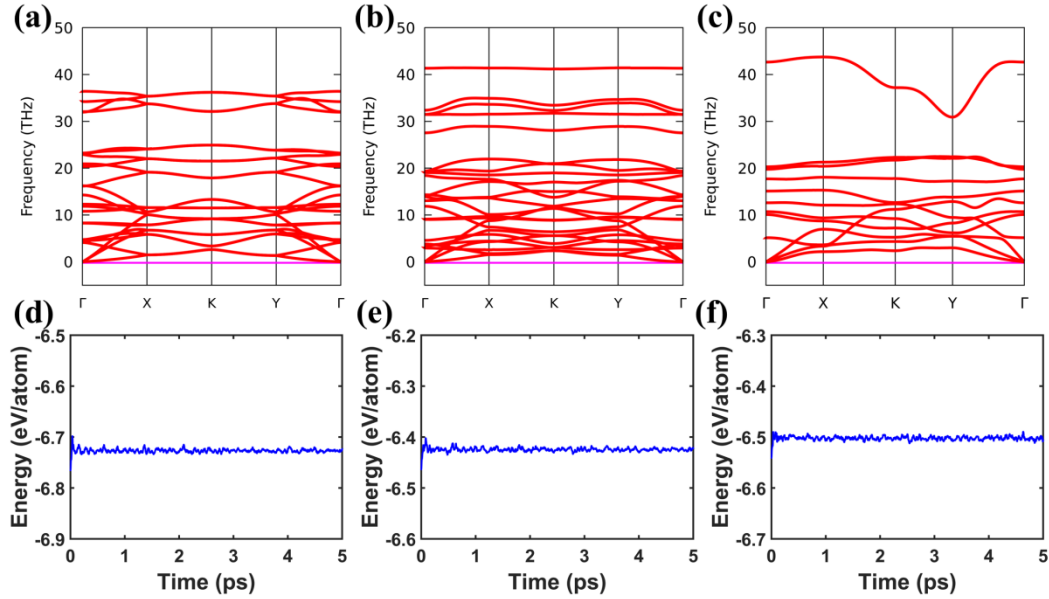

Fig.S2 Phonon spectra of (a) $T_1$ -SiC (b) $T_2$ -SiC and (c) $T_3$ -SiC, all branches have positive frequencies. And finite temperature(300k) molecular dynamics (MD) simulations of (d) $T_1$ -SiC (e) $T_2$ -SiC and (f) $T_3$ -SiC, The energy oscillates only slightly over time.

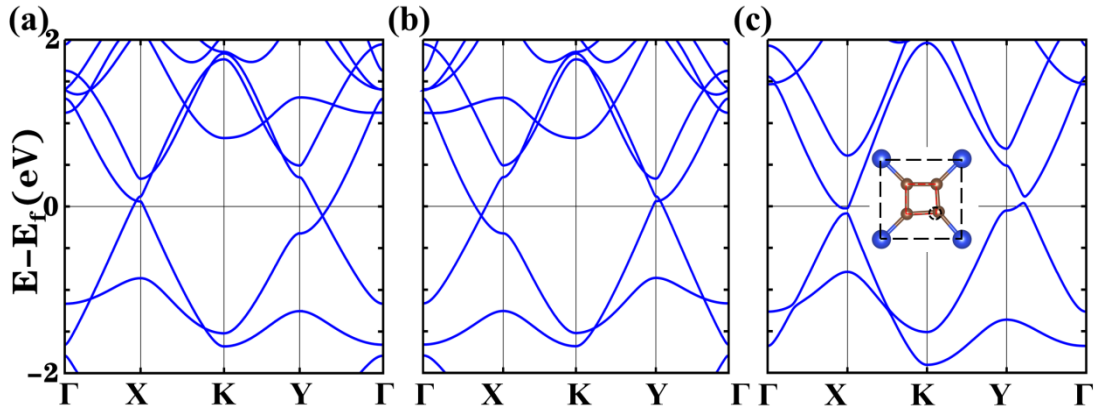

Fig.S3 Band structure of  $T_2$ -SiC with 8% strain applied along the (a)X-axis and (b)Y-axis, respectively. (c)The Dirac cone is opened when the structural symmetry is broken.

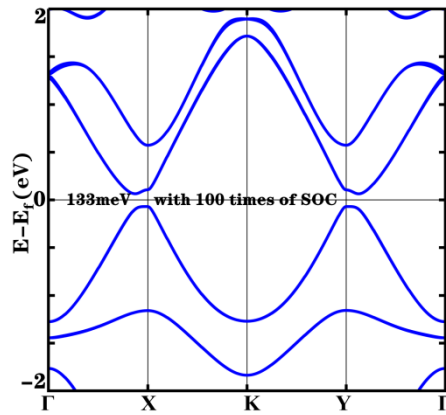

Fig.S4 Band structures with 100 times SOC of T<sub>2</sub>-SiC.

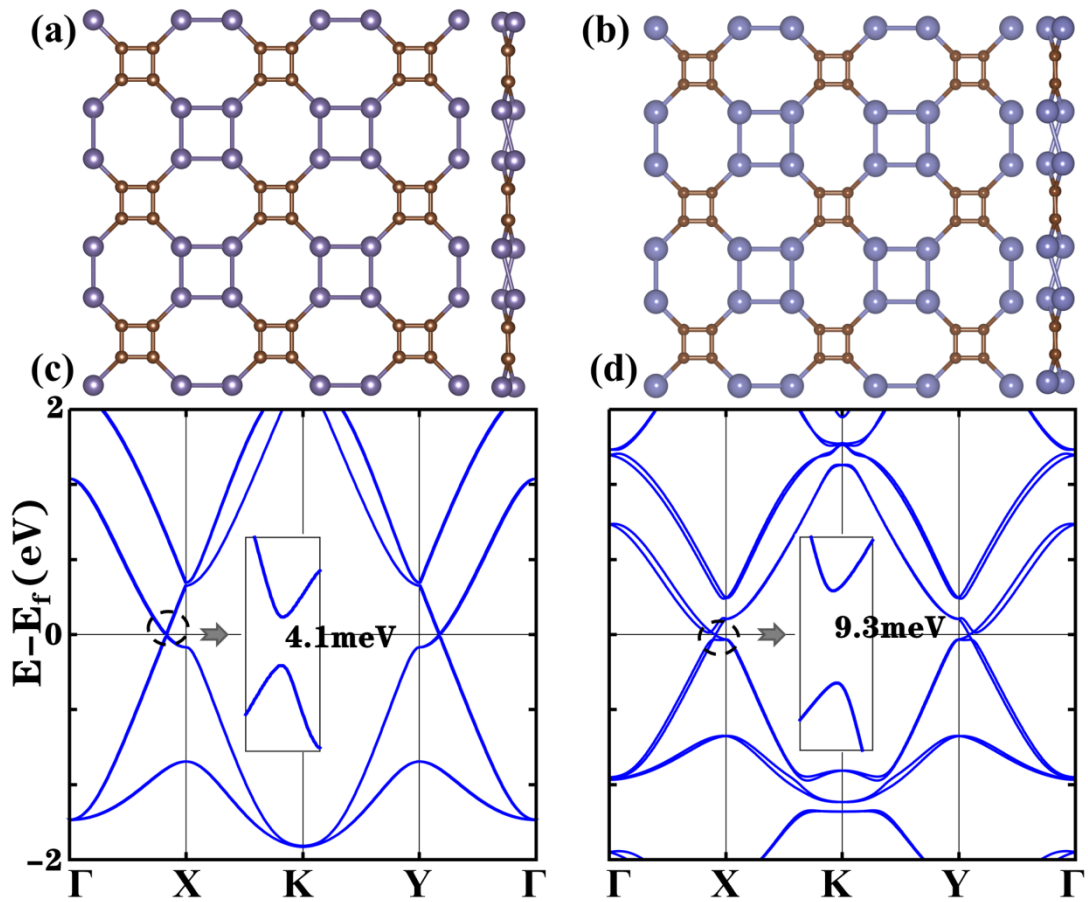

Fig.S5 The structure of (a)T<sub>2</sub>-GeC (b)T<sub>2</sub>-SnC. Band structures with SOC of (c)T<sub>2</sub>-GeC (d)T<sub>2</sub>-SnC.

### References

1. X. Qin, Y. Liu, X. Li, J. Xu, B. Chi, D. Zhai and X. Zhao, *J. Phys. Chem. Lett.*, 2015, **6**, 1333-1339.
2. Y. Liu, G. Wang, Q. Huang, L. Guo and X. Chen, *Phys. Rev. Lett.*, 2012, **108**, 225505.
